# Supplementary material
Source: publisher figshare collection journal article supplement (https://acs.figshare.com/ndownloader/files/4028221)
Supplement: Supplementary file 1 [file 4028221]

## Supplementary Information

# Patterned Enzymatic Degradation of Poly( $\epsilon$ -caprolactone) by High Affinity Micro Contact Printing (HA- $\mu$ CP) and Polymer Pen Lithography (PPL)

*Manoj Ganesh<sup>1</sup>, Jonathan Nachman<sup>2</sup>, Zhantong Mao<sup>3</sup>, Alan Lyons<sup>3</sup>, Miriam Rafailovich<sup>2</sup> &  
Richard Gross<sup>\*1</sup>*

<sup>1</sup> NSF I/UCRC for Biocatalysis & Bioprocessing of Macromolecules, Polytechnic Institute of  
NYU, Six Metrotech center, Brooklyn, NY-11201

<sup>2</sup> Department of Materials Science and Engineering, State University of New York at Stony  
Brook, Stony Brook, NY 11794-2275, USA

<sup>3</sup> Center for Engineered Polymer Materials, Department of Chemistry, College of Staten Island  
(CUNY), Building 6S - Room 225, 2800 Victory Boulevard, Staten Island, New York 10314

### **\*Corresponding Author**

Richard A. Gross; Email: [rgross@poly.edu](mailto:rgross@poly.edu); Ph: 718-260-3024; Fax: 718-260-3075

KEYWORDS: micro-contact printing, enzyme ink, patterned degradation, enzyme lithography

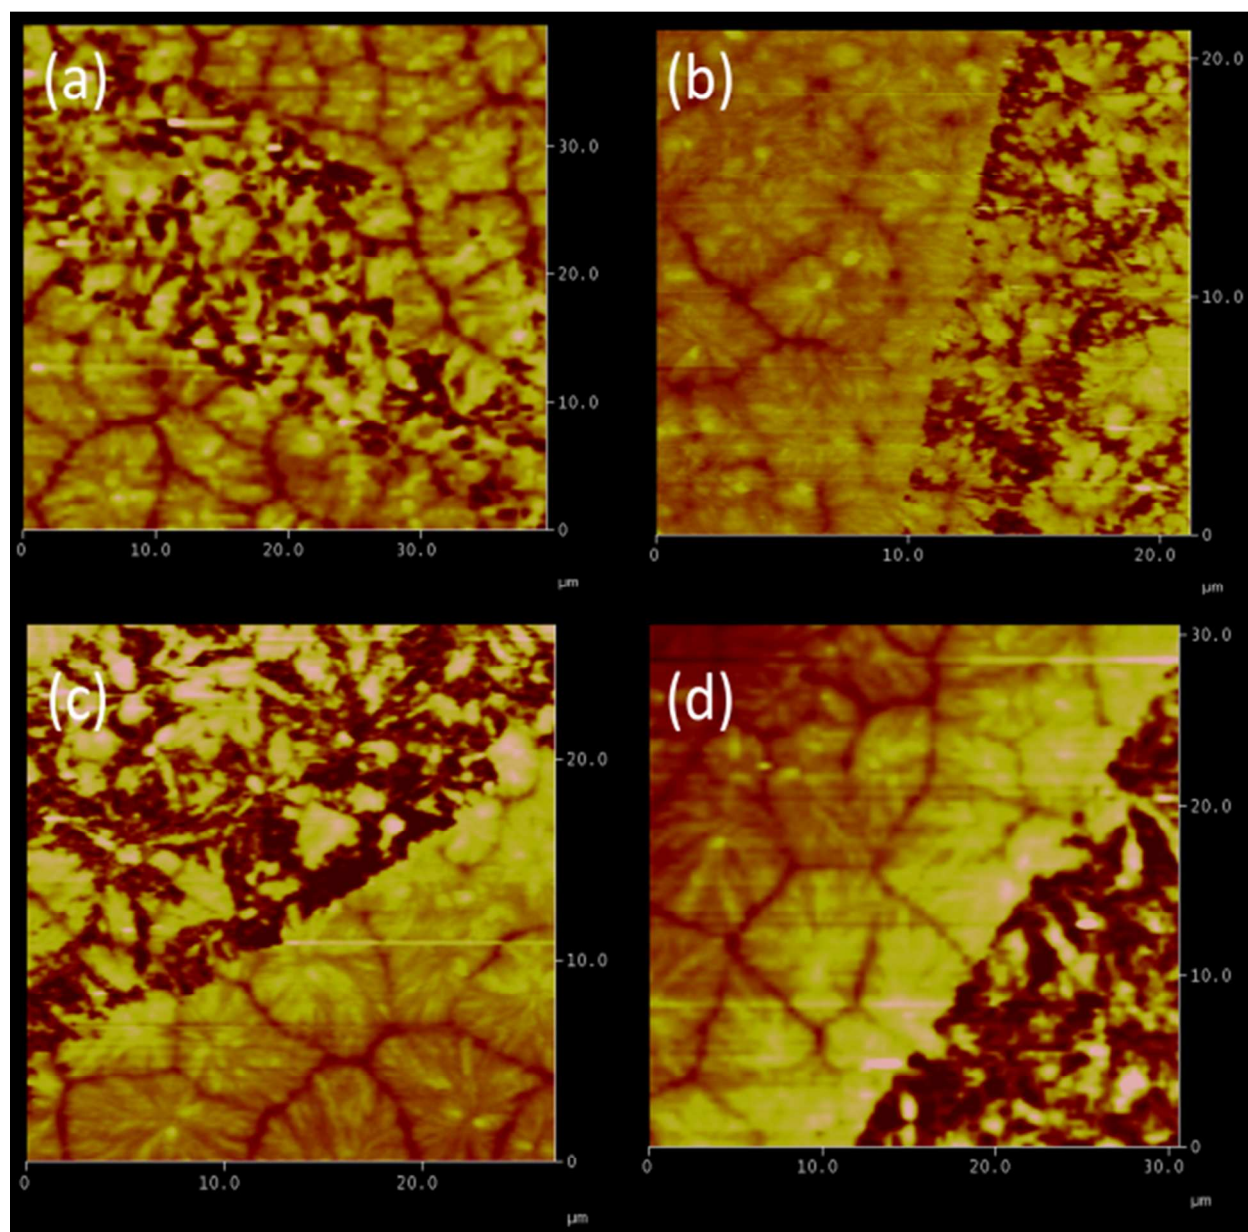

**Figure S1:** High magnification AFM images at (a) 3 day (b) 4 day (c) 10 day (d) 25 day.

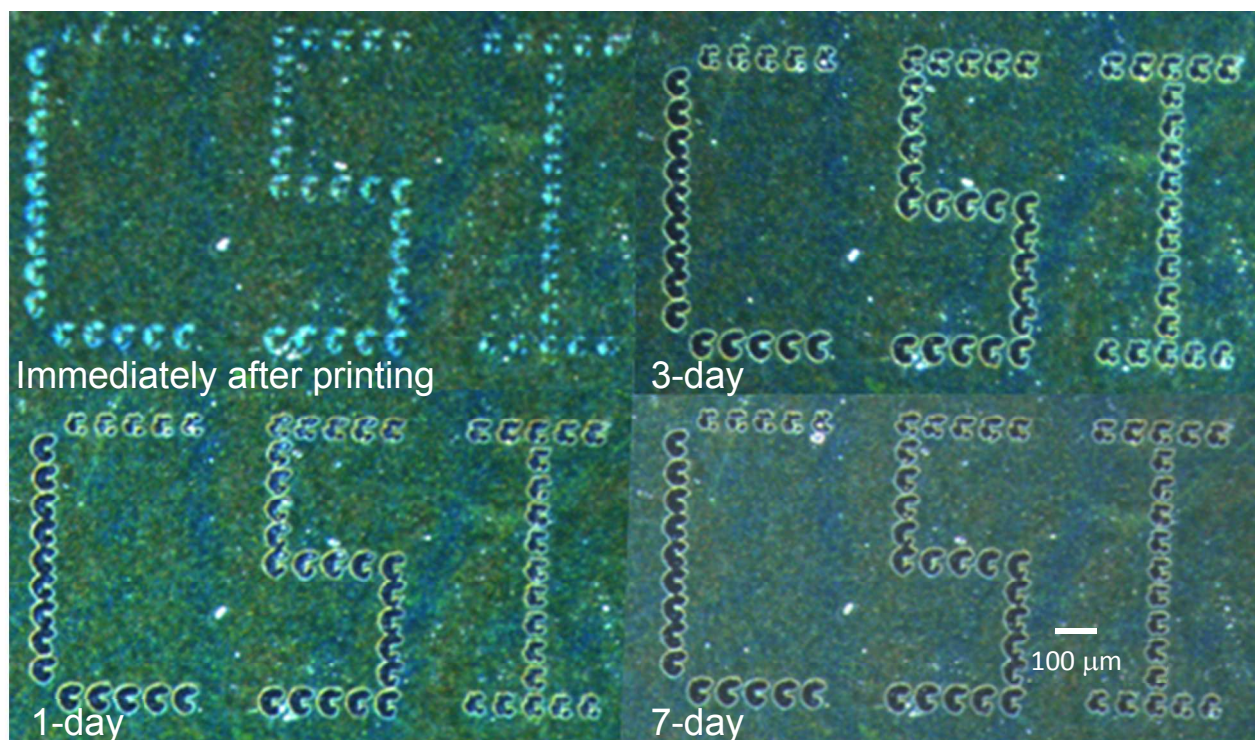

**Figure S2:** Optical microscope images of the enzyme pattern printed on a PCL film before incubation as well as after 1, 3 and 7 days of incubation at 37°C and 95% relative humidity.
